# Supplementary material
Source: Springer Nature journal article supplement (https://www.springermedizin.de/resource/supplementary/12885_2011_2729_MOESM1_ESM.pdf/9461788)

**A**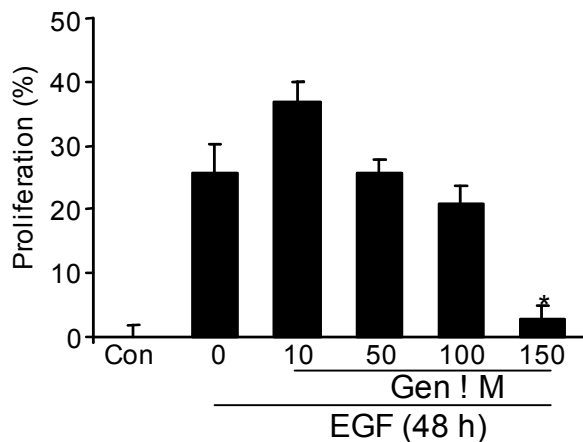**B**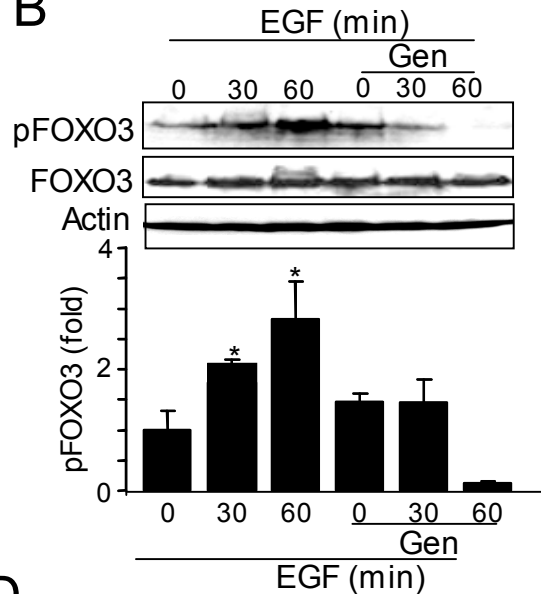**C**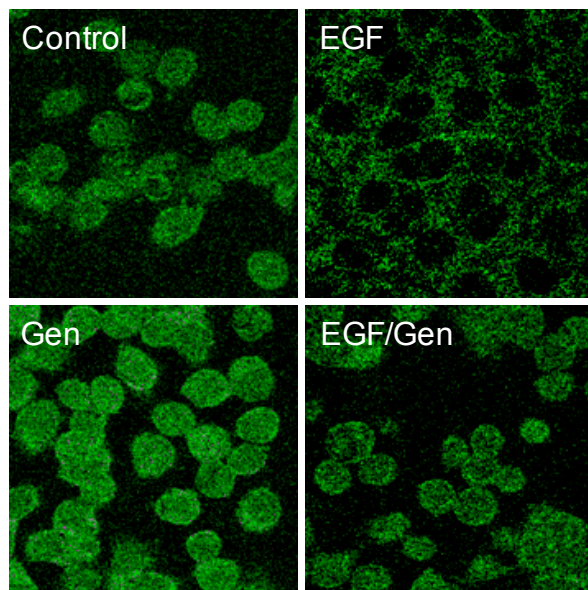**D**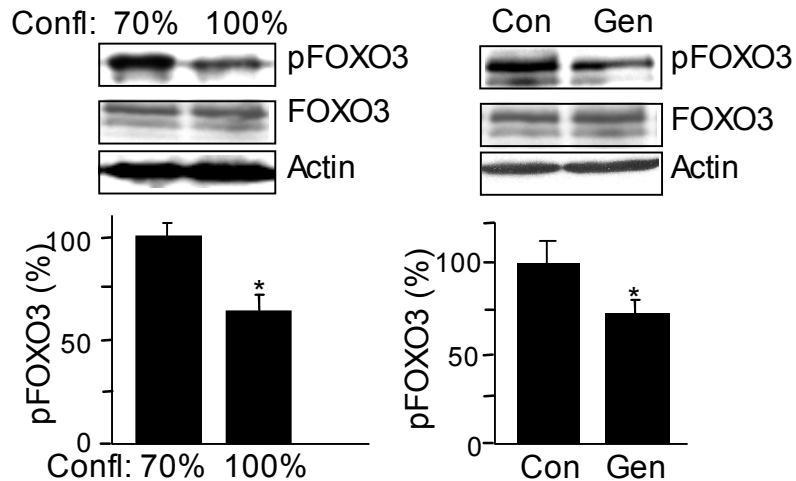

Supplement: MOESM1 [file 9461788]
